# Supplementary material for: Heterointerface Engineered Core-Shell Fe2O3@TiO2 for High-Performance Lithium-Ion Storage
Source: MDPI journal article supplement (doi:10.3390/molecules28196903), 2023-10-01
Supplement: s1 [file s1]

# **Heterointerface Engineered Core-Shell $\text{Fe}_2\text{O}_3@\text{TiO}_2$ for High-Performance Lithium-Ion Storage**

## **Contents:**

**S1. Characterization methods and details analysis**

**S2. Results and discussion**

**Figure S1.** Preparation of  $\text{Fe}_2\text{O}_3@\text{TiO}_2$  heterostructure.

**Figure S2.** TEM image and the corresponding elemental mapping of Fe, Ti, O for  $\text{Fe}_2\text{O}_3@\text{TiO}_2$  heterostructure.

**Figure S3.** Electrochemical properties of  $\text{Fe}_2\text{O}_3$  as anode material for LIBs.

**Figure S4.** Electrochemical properties of  $\text{TiO}_2$  as anode material for LIBs.

**Figure S5.** Electrochemical properties of  $\text{Fe}_2\text{O}_3@\text{TiO}_2$  as anode material for LIBs.

**Figure S6.** EIS image of  $\text{Fe}_2\text{O}_3$ ,  $\text{TiO}_2$  and  $\text{Fe}_2\text{O}_3@\text{TiO}_2$ .

**Table S1.** Table of electrochemical performance comparison.

**Reference**

## **S1. Characterization methods and details analysis**

### **S1.1. Materials characterization**

Transmission electron microscopy (TEM, Tecnai 20U-Twin microscope) is used to examine the morphology. X-ray diffraction (XRD, X'pert Pro MPD) patterns are measured on a diffractometer with Cu-K $\alpha$  radiation ( $\lambda = 0.15443$  nm). Raman spectra are collected with 532 nm photons from an Ar<sup>+</sup> laser. X-ray photoelectron spectroscopy (XPS) is inspected on the Thermo ESCALAB 250.3.

### **S1.2. Device assembly measurements**

The CR2016-type coin cells are assembled in an argon-filled glove box. Li metal is used as the counter and reference electrode. The positive and negative electrodes are electronically separated by a polypropylene film (Celgard 2320) saturated with electrolytes. The electrolyte solution is LiPF<sub>6</sub> (1 M) in ethylene carbonate/dimethyl carbonate/diethyl carbonate (1:1:1 vol %). The cycling and rate performances are recorded on a NEWARE battery measurement system, and cyclic voltammetry (CV) is performed using a CHI660D electrochemical workstation (Shanghai CH Instruments Co., China). Electrochemical impedance spectroscopy (EIS) measurements are also carried out on the CHI660D electrochemical workstation.

## S2. Results and discussion

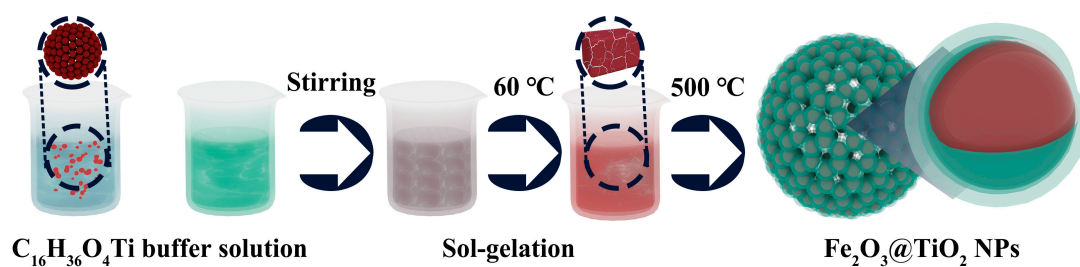

**Figure S1.** Preparation of  $\text{Fe}_2\text{O}_3@\text{TiO}_2$  heterostructure.

$\text{Fe}_2\text{O}_3@\text{TiO}_2$  preparation is divided into three steps. As shown in Figure S1,  $\text{Fe}_2\text{O}_3$  particles are prepared by hydrothermal method. The specific scheme is to dissolve 1 g  $\text{FeCl}_3 \cdot 6\text{H}_2\text{O}$  into 30 ml deionized water, and stirring continuously. Then 0.5 g polyvinylpyrrolidone (PVP) is added into the solution, continuously stirring. The solution is transferred into a polytetrafluoroethylene lining and assembled into a high-pressure reactor.  $\text{Fe}_2\text{O}_3$  particles are obtained by holding at 200 °C for 600 min. The second step is the sol-gel process. Firstly, the buffer solution is prepared, and the 20 ml  $\text{C}_2\text{H}_6\text{O}$  is mixed with 2 ml  $\text{CH}_3\text{COOH}$ . After evenly mixing, 5 ml of  $\text{C}_{16}\text{H}_{36}\text{O}_4\text{Ti}$  is slowly added and continuously stirred. The pre-prepared  $\text{Fe}_2\text{O}_3$  particles are ultrasonically dispersed into 3 ml deionized water, and 10 ml anhydrous ethanol is added to stir well, then the pH value is adjusted with HCl to 4, referred to as dispersion solution 1. Add dispersion solution 1 to the buffer solution slowly, stirring continuously until a gel forms. The gel is aged for 24 h and then put into a vacuum drying box at 60 °C for drying. The powder obtained after drying is fully ground with a mortar. Then it was put into a tube furnace and heated at a heating rate of 10 °C  $\text{min}^{-1}$  to 500 °C under argon atmosphere for 30 min. After natural cooling, reddish-brown powder is prepared as  $\text{Fe}_2\text{O}_3@\text{TiO}_2$ .

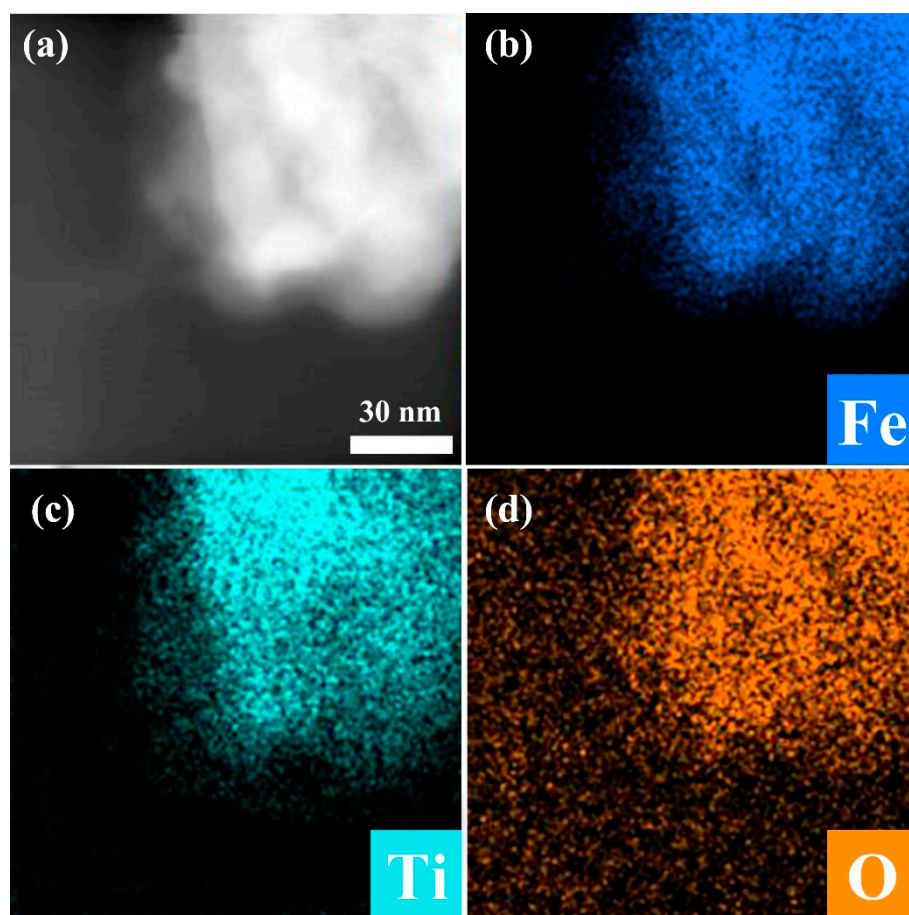

**Figure S2.** (a) TEM image and (b-d) the corresponding elemental mapping of Fe, Ti, O for  $\text{Fe}_2\text{O}_3@\text{TiO}_2$  heterostructure.

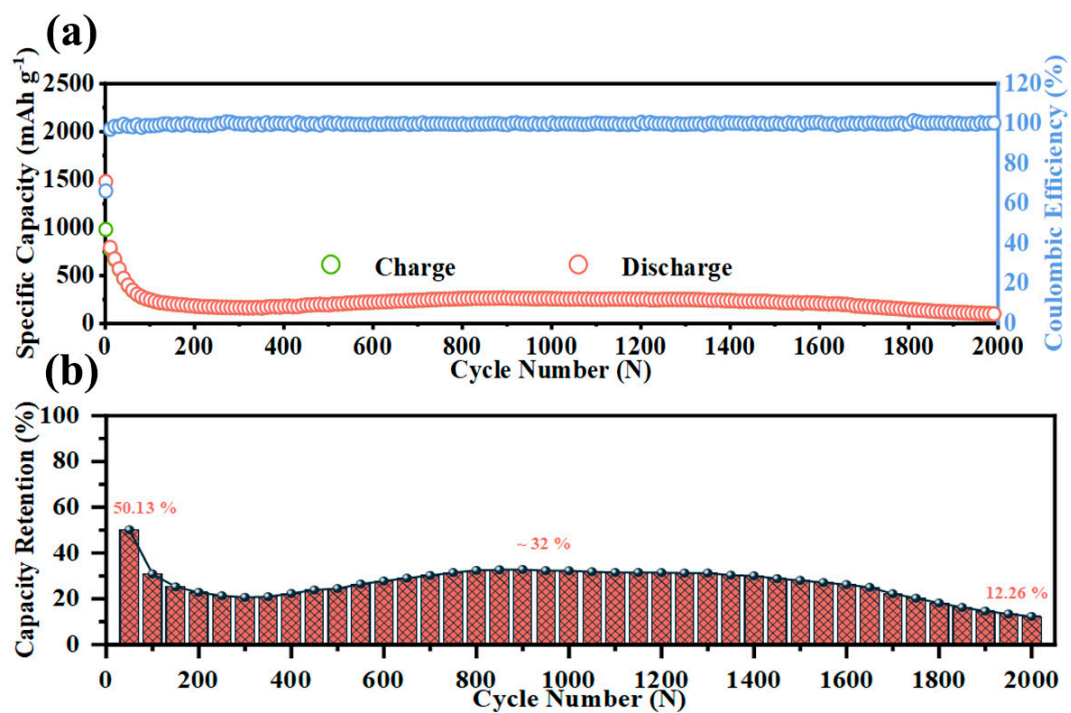

**Figure S3.** Electrochemical properties of Fe<sub>2</sub>O<sub>3</sub> as anode material for LIBs: (a) cycling performance at a current density of 1.0 A g<sup>-1</sup>, (b) corresponding capacity retention and fitted linear curve.

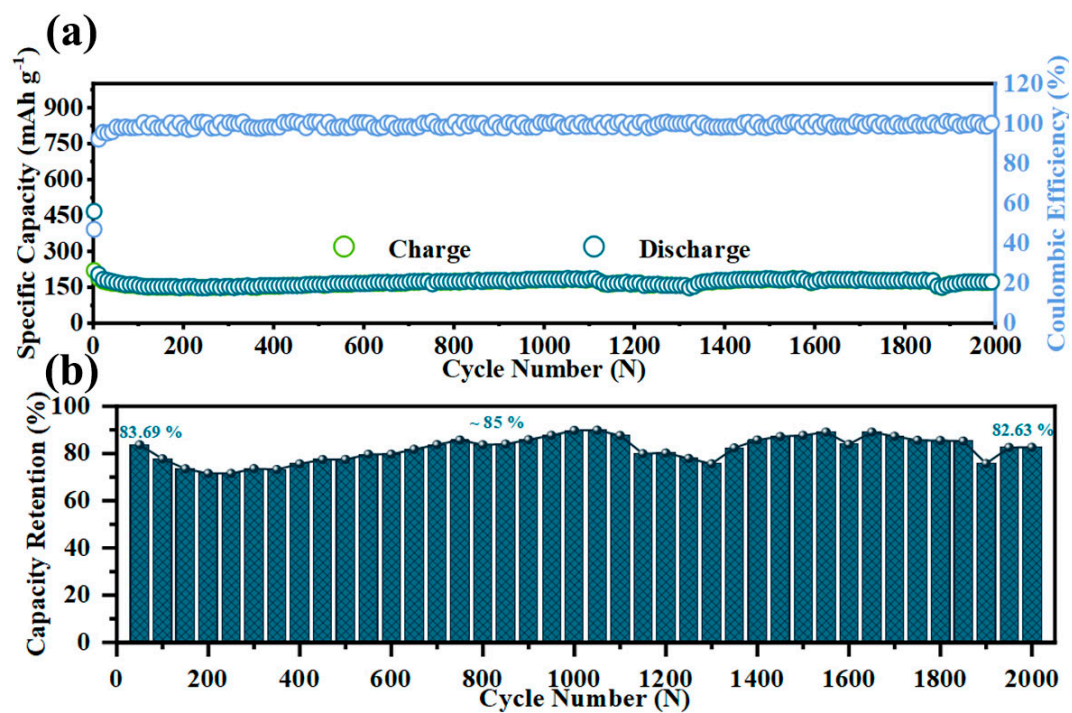

**Figure S4.** Electrochemical properties of  $\text{TiO}_2$  as anode material for LIBs: (a) cycling performance at a current density of  $1.0 \text{ A g}^{-1}$ , (b) corresponding capacity retention and fitted linear curve.

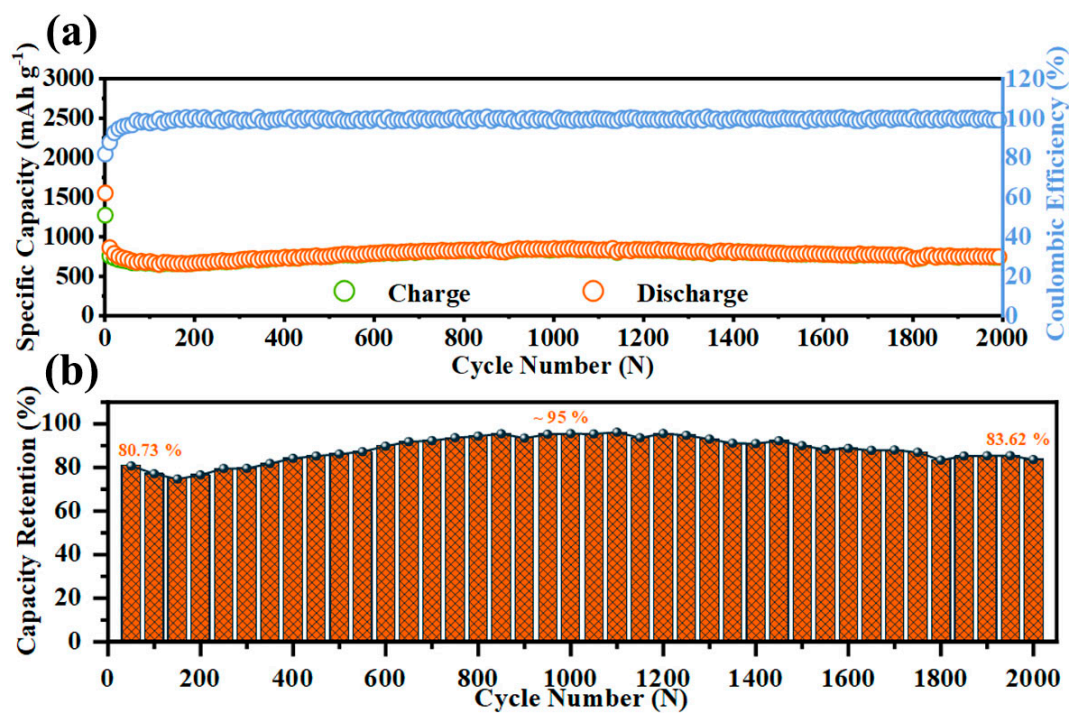

**Figure S5.** Electrochemical properties of  $\text{Fe}_2\text{O}_3@\text{TiO}_2$  as anode material for LIBs: (a) cycling performance at a current density of  $1.0 \text{ A g}^{-1}$ , (b) corresponding capacity retention and fitted linear curve.

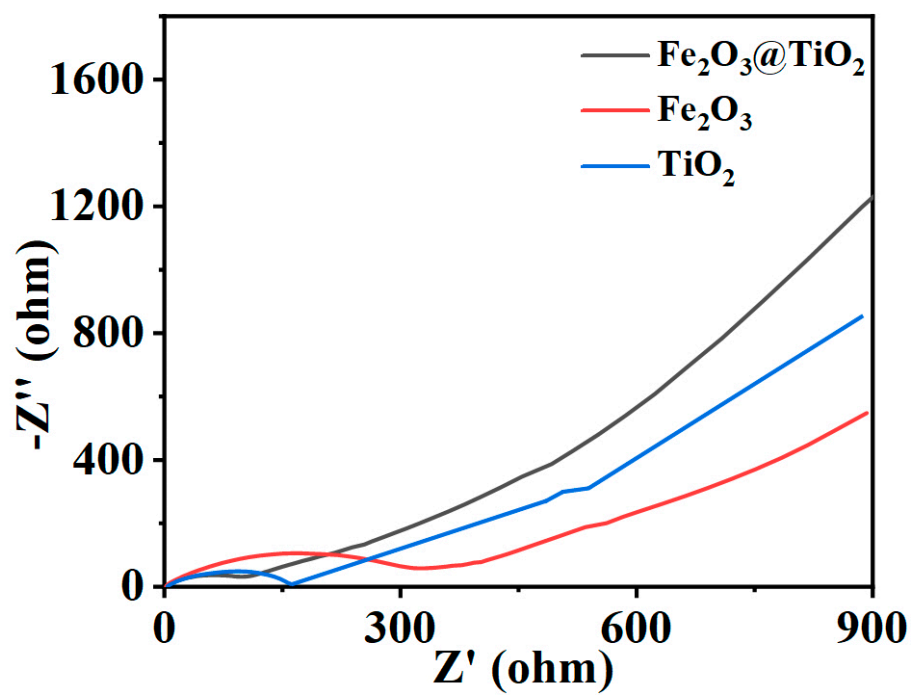

**Figure S6.** EIS image of  $\text{Fe}_2\text{O}_3$ ,  $\text{TiO}_2$  and  $\text{Fe}_2\text{O}_3@\text{TiO}_2$ .

**Table S1.** Table of electrochemical performance comparison.

| <b>Material</b>                                                                 | <b>Current density</b> | <b>Cycle number</b> | <b>Discharge capacity</b> | <b>Ref.</b> |
|---------------------------------------------------------------------------------|------------------------|---------------------|---------------------------|-------------|
| This work                                                                       | 0.1 A g <sup>-1</sup>  | 300                 | 1342 mAh g <sup>-1</sup>  | /           |
| Fe <sub>3</sub> O <sub>4</sub> @C                                               | 0.5 C                  | 200                 | ~1200 mAh g <sup>-1</sup> | [1]         |
| Fe <sub>2</sub> O <sub>3</sub> /rGO                                             | 0.2 A g <sup>-1</sup>  | 30                  | 704 mAh g <sup>-1</sup>   | [2]         |
| Ti-Fe <sub>2</sub> O <sub>3</sub> @rGO                                          | 0.2 A g <sup>-1</sup>  | 120                 | 1155 mAh g <sup>-1</sup>  | [3]         |
| TiO <sub>2</sub> @Fe <sub>2</sub> O <sub>3</sub>                                | 0.12 A g <sup>-1</sup> | 150                 | 497 mAh g <sup>-1</sup>   | [4]         |
| Fe <sub>2</sub> O <sub>3</sub> @TiO <sub>2</sub> nanotube                       | 0.2 A g <sup>-1</sup>  | 150                 | 450 mAh g <sup>-1</sup>   | [5]         |
| Fe <sub>2</sub> O <sub>3</sub> @Li <sub>4</sub> Ti <sub>5</sub> O <sub>12</sub> | 0.1 A g <sup>-1</sup>  | 30                  | ~300 mAh g <sup>-1</sup>  | [6]         |
| Fe <sub>3</sub> O <sub>4</sub> @C                                               | 0.05 A g <sup>-1</sup> | 40                  | 1080 mAh g <sup>-1</sup>  | [7]         |
| Fe <sub>2</sub> N@amorphous carbon                                              | 0.5 A g <sup>-1</sup>  | 500                 | 534 mAh g <sup>-1</sup>   | [8]         |
| Fe <sub>2</sub> O <sub>3</sub> /Fe <sub>3</sub> O <sub>4</sub> @Carbon          | 0.5 A g <sup>-1</sup>  | 200                 | 1210 mAh g <sup>-1</sup>  | [9]         |
| C@Fe <sub>2</sub> O <sub>3</sub> /SWCNT                                         | 0.05 A g <sup>-1</sup> | 200                 | 1294 mAh g <sup>-1</sup>  | [10]        |

## References

1. Liu, Z.; Yu, X.-Y.; Paik, U., Etching-in-a-Box: A Novel Strategy to Synthesize Unique Yolk-Shelled  $\text{Fe}_3\text{O}_4$ @Carbon with an Ultralong Cycling Life for Lithium Storage. *Adv. Energy Mater.* **2016**, 6, (6), 1502318.
2. Wang, L.; Chen, Q.; Zhu, Y.; Qian, Y., Graphene-wrapped  $\text{Fe}_2\text{O}_3$  nanorings for Li ion battery anodes. *Chin. Sci. Bull.* **2014**, 59, (32), 4271-4273.
3. Lin, Y.; Sun, L.; Hu, J.; Tan, H.; Xie, F.; Qu, Y.; Wang, K.; Zhang, Y., Ti-doped  $\text{Fe}_2\text{O}_3$ /carbon cloth anode with oxygen vacancies and partial rGO encapsulation for flexible lithium ion batteries. *J. Alloys Compd.* **2022**, 924, 166441.
4. Luo, Y.; Luo, J.; Jiang, J.; Zhou, W.; Yang, H.; Qi, X.; Zhang, H.; Fan, H. J.; Yu, D. Y. W.; Li, C. M.; Yu, T., Seed-assisted synthesis of highly ordered  $\text{TiO}_2$ @ $\alpha$ - $\text{Fe}_2\text{O}_3$  core/shell arrays on carbon textiles for lithium-ion battery applications. *Energy Environ. Sci.* **2012**, 5, (4), 6559-6566.
5. Lv, X.; Deng, J.; Sun, X., Cumulative effect of  $\text{Fe}_2\text{O}_3$  on  $\text{TiO}_2$  nanotubes via atomic layer deposition with enhanced lithium ion storage performance. *Appl. Surf. Sci.* **2016**, 369, 314-319.
6. Chen, M.; Li, W.; Shen, X.; Diao, G., Fabrication of Core-Shell  $\alpha$ - $\text{Fe}_2\text{O}_3$ @ $\text{Li}_4\text{Ti}_5\text{O}_{12}$  Composite and Its Application in the Lithium Ion Batteries. *ACS Appl. Mater. Interfaces* **2014**, 6, (6), 4514-4523.
7. Su, L.; Zhong, Y.; Zhou, Z., Role of Transition Metal Nanoparticles in the Extra Lithium Storage Capacity of Transition Metal Oxides: A Case Study of Hierarchical Core-shell  $\text{Fe}_3\text{O}_4$ @C and  $\text{Fe}$ @C Microspheres. *J. Mater. Chem. A* **2013**, 1, (47), 15158-15166.
8. Ding, R.; Zhang, J.; Zhang, J.; Li, Z.; Wang, C.; Chen, M., Core-shell  $\text{Fe}_2\text{N}$ @amorphous carbon nanocomposite-filled 3D graphene framework: An additive-free anode material for lithium-ion batteries. *Chem. Eng. J.* **2019**, 360, 1063-1070.
9. Li, Y.; Fu, Y.; Chen, S.; Huang, Z.; Wang, L.; Song, Y., Porous  $\text{Fe}_2\text{O}_3/\text{Fe}_3\text{O}_4$ @Carbon octahedron arrayed on three-dimensional graphene foam

- for lithium-ion battery. *Composites, Part B* **2019**, 171, 130-137.
10. Wang, W.; Feng, Y.; Zhang, S.; Wang, M.; Song, W.; Yue, L.; Ge, M.; Mi, J., Facile premixed flame synthesis C@Fe<sub>2</sub>O<sub>3</sub>/SWCNT as superior free-standing anode for lithium-ion batteries. *J. Alloys Compd.* **2022**, 905, 164247.
